# Supplementary material
Source: ML conference proceedings conference paper supplement (https://openreview.net/forum?id=A6ikGJRaKL)
Supplement: supplementary_material [file attachment]

## 396 Appendix

### 397 A ADROIT Hand Experimental Details

#### 398 A.1 Task State Space Design

399 **Door opening.** Given a randomized door position, undo the latch and drag the door open. In this  
 400 task,  $\mathbf{x}_r(t) \in \mathcal{X}_r \subset \mathbb{R}^{28}$  (24-DoF hand + 3-DoF wrist rotation + 1-DoF wrist motion) as the floating  
 401 wrist base can only move along the direction that is perpendicular to the door plane but rotate freely.  
 402 Regarding the object states,  $\mathbf{x}_o(t) = [\mathbf{p}_t^{\text{handle}}, v_t, \mathbf{p}^{\text{door}}] \in \mathcal{X}_o \subset \mathbb{R}^7$ , containing the door position  
 403  $\mathbf{p}^{\text{door}}$ , handle position  $\mathbf{p}^{\text{handle}}$  and the angular velocity of the door opening angle  $v_t$ .

404 **Tool use.** Pick up the hammer to drive the nail into the board placed at a randomized height. In  
 405 this task,  $\mathbf{x}_r(t) \in \mathcal{X}_r \subset \mathbb{R}^{26}$  (24-DoF hand + 2-DoF wrist rotation) as the floating wrist base can  
 406 only rotate along the  $x$  and  $y$  axis.  $\mathbf{x}_o(t) = [\mathbf{p}_t^{\text{tool}}, \mathbf{o}_t^{\text{tool}}, \mathbf{p}^{\text{nail}}]$  containing the nail goal position  $\mathbf{p}^{\text{nail}}$ ,  
 407 hammer positions  $\mathbf{p}_t^{\text{tool}}$  and orientations  $\mathbf{o}_t^{\text{tool}}$ .

408 **Object relocation.** Move the blue ball to a randomized target location (green sphere). In this  
 409 task,  $\mathbf{x}_r(t) \in \mathcal{X}_r \subset \mathbb{R}^{30}$  (24-DoF hand + 6-DoF floating wrist base) as the ADROIT hand is fully  
 410 actuated.  $\mathbf{x}_o(t) = [\mathbf{p}_t^{\text{ball}}, \mathbf{o}_t^{\text{ball}}]$  containing the target positions  $\mathbf{p}^{\text{target}}$  and current positions  $\mathbf{p}_t^{\text{ball}}$ .

411 **In-hand reorientation.** Reorient the blue pen to a randomized goal orientation (green pen). In  
 412 this task,  $\mathbf{x}_r(t) \in \mathcal{X}_r \subset \mathbb{R}^{24}$  (24-DoF hand) as floating wrist base is fixed.  $\mathbf{x}_o(t) = [\mathbf{p}_t^{\text{pen}}, \mathbf{o}_t^{\text{pen}}]$   
 413 containing the goal orientations  $\mathbf{o}^{\text{goal}}$  and current pen orientations  $\mathbf{o}_t^{\text{pen}}$ , which are both unit direction  
 414 vectors.

415 The task success criteria is the same as defined in [6].

#### 416 A.2 Policy Design and Training

417 **Koopman Operator** The lifting functions of Koopman Operator are taken from [6]. The represen-  
 418 tation of the system is given as:  $\mathbf{x}_r = [x_r^1, x_r^2, \dots, x_r^n]$  and  $\mathbf{x}_o = [x_o^1, x_o^2, \dots, x_o^m]$  and superscript  
 419 is used to index states. In experiments, the vector-valued lifting functions  $\psi_r$  and  $\psi_o$  in (3) were  
 420 defined as polynomial basis functions:

$$\begin{aligned} \psi_r &= \{x_r^i x_r^j\} \cup \{(x_r^i)^2\} \cup \{(x_r^i)^3\} \text{ for } i, j = 1, \dots, n \\ \psi_o &= \{x_o^i x_o^j\} \cup \{(x_o^i)^2\} \cup \{(x_o^i)^2 (x_o^j)\} \text{ for } i, j = 1, \dots, m \end{aligned} \quad (7)$$

421 Note that  $x_r^i x_r^j / x_r^j x_r^i$  and  $x_o^i x_o^j / x_o^j x_o^i$  each appear only once in the lifting functions.  $t$  is ignored here  
 422 as the lifting functions are the same across the time horizon. Thus, the dimension of the Koopman  
 423 Operator  $\mathbf{K} \in \mathbb{R}^{p \times p}$ , where  $p = 3n + 2m + m^2 + \frac{n(n-1)}{2} + \frac{m(m-1)}{2}$ .

424 **KOROL Training** In *Door opening* and *Tool use* tasks, the feature extractor is trained solely using  
 425 RGBD images. While in *Relocation* and *Reorientation* tasks, the feature extractor is additionally  
 426 provided with the desired goal locations  $\mathbf{p}^{\text{target}}$  and goal orientations  $\mathbf{o}^{\text{goal}}$ . The full list of training  
 427 hyperparameters can be found in Table 4.

#### 428 A.3 Baselines

429 We ran BC and NDP based on the implementation in [6]

430 <https://github.com/GT-STAR-Lab/KODex>.

431 For Diffusion Policy, we used the author’s original implementation [16]

432 <https://github.com/real-stanford/diffusion.policy>.

| Hyperparameter                                               | Value                               |
|--------------------------------------------------------------|-------------------------------------|
| Feature Extractor                                            | ResNet18                            |
| Input RGBD Image Dimension                                   | $256 \times 256 \times 4$           |
| Input Desired Poisition and Orientation Encoder              | HarmonicEmbedding                   |
| Input Desired Poisition and Orientation Dimension            | 3                                   |
| Output Desired Poisition and Orientation Embedding Dimension | 15                                  |
| Output Object Feature Dimension                              | 8                                   |
| Batch Size                                                   | 8                                   |
| Prediction Horizon                                           | 40                                  |
| Learning rate                                                | $1 * 10^{-4}$                       |
| Adam betas                                                   | (0.9, 0.999)                        |
| Learning rate decay                                          | Linear decay (see code for details) |
| Max Training Epoch                                           | 300                                 |
| Max Execution Step Num                                       | 100                                 |

Table 4: Hyperparameters of KOROL Training for ADROIT Hand Experiments.

#### A.4 Inverse Dynamic Controller

We employ a pre-trained inverse dynamics controller  $C$ , specific to each task, as detailed in [6]. Each controller  $C$  is trained to output actions corresponding to the dimensionality of the robot state defined for its specific task.

## B Real-World Experimental Details

### B.1 Robot State Space and Task Definition

In the physical robot experiment, we employ a Kinova robotic arm. The configuration space of the robot  $\mathbf{x}_r(t) \in \mathcal{X}_r \subset \mathbb{R}^7$  includes three degrees of freedom (DOF) for the end-effector’s position, three DOF for its orientation (ranging from 0 to 360 degrees), and one DOF for the gripper’s position (ranging from 0 to 1). The task definition and success criteria are discussed in Section 5.2.

### B.2 Experiment Details

The Koopman Operator design, KOROL and baselines training are the same as in our simulation. The only difference is that we no longer need to use an inverse dynamic controller to compute torque for each joint. Instead, we publish the predicted end-effector position and gripper position through Kinova API to control robot.

| Model                    | Door opening |       | Tool use |      | Relocation |      | Reorientation |       |
|--------------------------|--------------|-------|----------|------|------------|------|---------------|-------|
|                          | 10           | 200   | 10       | 200  | 10         | 200  | 10            | 200   |
| KOROL w/o transformation | 93.2%        | 99.9% | 84.5%    | 100% | 45.5%      | 100% | 17.4%         | 87.0% |
| KOROL                    | 98.6%        | 99.9% | 94.3%    | 100% | 99.8%      | 100% | 55.6%         | 86.4% |

Table 5: KOROL Performance in ADROIT Hand with and w/o Frequency Domain Image.

| Task                     | Relocation | Pickup | Insertion |
|--------------------------|------------|--------|-----------|
| KOROL w/o transformation | 19/20      | 17/20  | 6/20      |
| KOROL                    | 20/20      | 19/20  | 11/20     |

Table 6: KOROL Performance in Real-World Manipulation with and w/o Frequency Domain Images.

| Task          | KOROL w/o transformation |          |          | KOROL    |          |          |
|---------------|--------------------------|----------|----------|----------|----------|----------|
|               | ResNet18                 | ResNet34 | ResNet50 | ResNet18 | ResNet34 | ResNet50 |
| Door opening  | 99.9%                    | 96.0%    | 0%       | 99.9%    | 100%     | 100%     |
| Tool use      | 75.3%                    | 48.9%    | 0%       | 100%     | 99.9%    | 100%     |
| Relocation    | 49.1%                    | 91.6%    | 0%       | 78.2%    | 93.8%    | 81.3%    |
| Reorientation | 86.6%                    | 85.3%    | 23.8%    | 85.9%    | 86.8%    | 85.9%    |

Table 7: **KOROL Performance in Multi-tasking Tasks with and w/o Frequency Domain Images.**

## C Multi-tasking Experimental Details

As discussed in Section A, the robot state space in the Mujoco environment varies slightly across different tasks. To standardize this, we augment the state space to  $\mathbb{R}^{30}$ , which includes a 24-DoF hand and a 6-DoF floating wrist base, by padding zeros to the missing robot states. For instance, in *Door opening* task, we pad zeros to the  $Tx$  and  $Ty$  motion directions.

For multi-tasking controllers, it is necessary to remove the padding from the robot state and select the appropriate elements to compute the action accordingly. When evaluating the unified Koopman operator  $\mathbf{K}$  and the feature extractor  $f_\theta$ , we continue to use a specific controller  $C$  for each task due to time constraints. However, we believe it is entirely feasible to train a single, unified controller  $C$  for all tasks with dimensionally-aligned demonstrations.

## D Ablation of Using Image Transformation

Because of the enhanced performance observed in prior works [42, 43] using frequency domain images, this section evaluates the impact of employing transformed images in the frequency domain across various settings: simulation, real-world manipulation, and multi-tasking. The model denoted as KOROL utilizes both spatial and frequency-domain images as inputs, whereas KOROL w/o transformation uses only spatial images. The results in Table 5, Table 6 and Table 7 demonstrate significant improvements achieved by incorporating transformed images in all tasks, corroborating the findings in [42, 43].
